# Supplementary material for: Synergistic modification of commercial TiO2 by combined carbon sources of citric acid and sodium carboxymethyl cellulose
Source: Royal Society of Chemistry journal article supplement (doi:10.1039/c9nj05412j), 2019-12-19
Supplement: c9nj05412j7.pdf [file c9nj05412j7.pdf]

## Supporting Information

### Synergistic modification of commercial TiO<sub>2</sub> by combined carbon sources of citric acid and sodium carboxymethyl cellulose

Rui-Lin Bai<sup>a</sup>, Yu-Jun Bai<sup>b,\*</sup>

<sup>a</sup>School of Chemistry and Molecular Science, Wuhan University, Wuhan, 430072, PR China

<sup>b</sup>Key Laboratory for Liquid-Solid Structural Evolution & Processing of Materials (Ministry of Education), Shandong University, Jinan, 250061, PR China

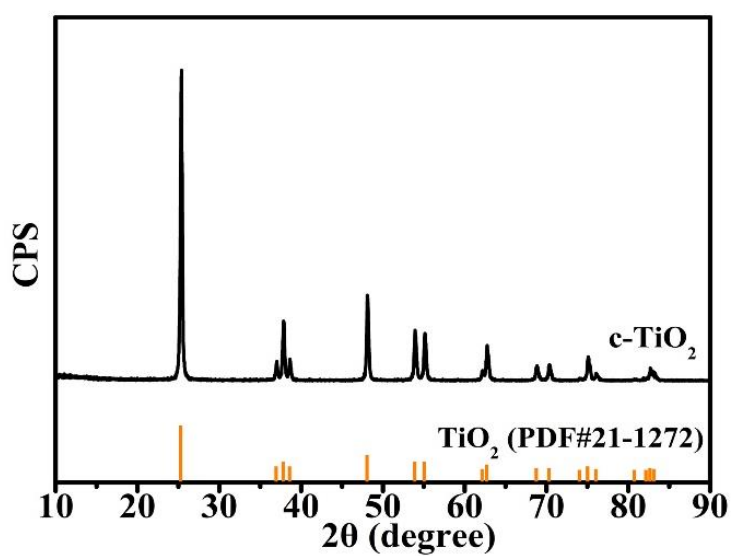

Fig. S1 XRD pattern of the as-sintered c-TiO<sub>2</sub> at 750 °C for 5 h.

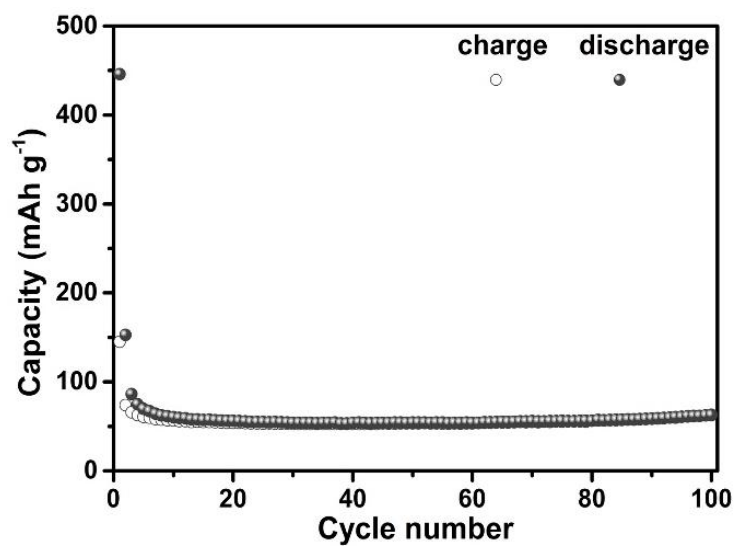

Fig. S2 Cycling performance of the as-sintered c-TiO<sub>2</sub> at 100 mA g<sup>-1</sup>.

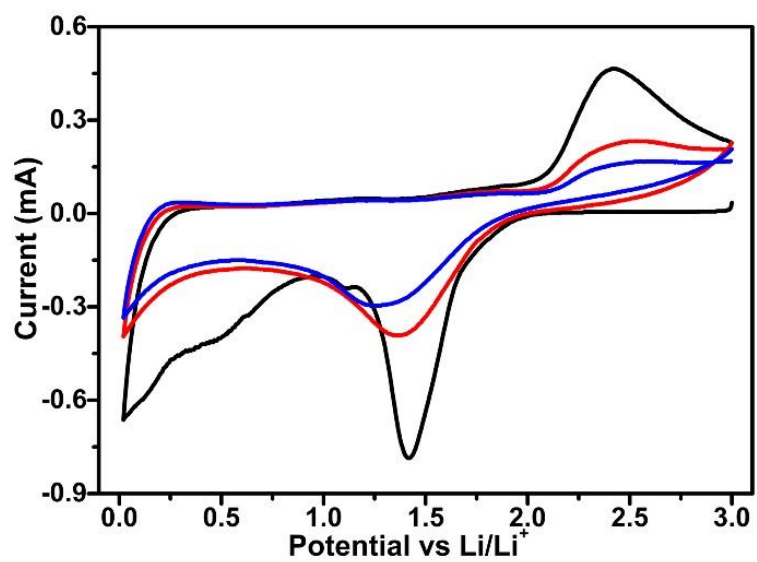

Fig. S3 CV plot of the as-sintered c-TiO<sub>2</sub>.

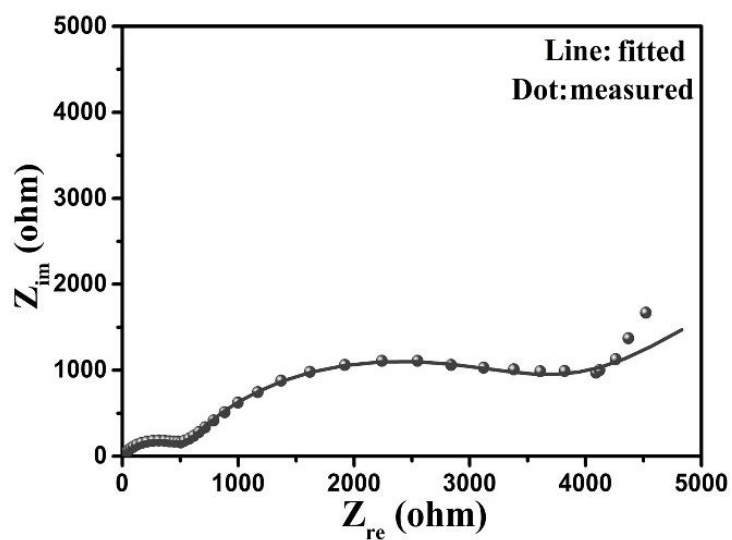

**Fig. S4** Measured and fitted EIS of the as-sintered c-TiO<sub>2</sub>.

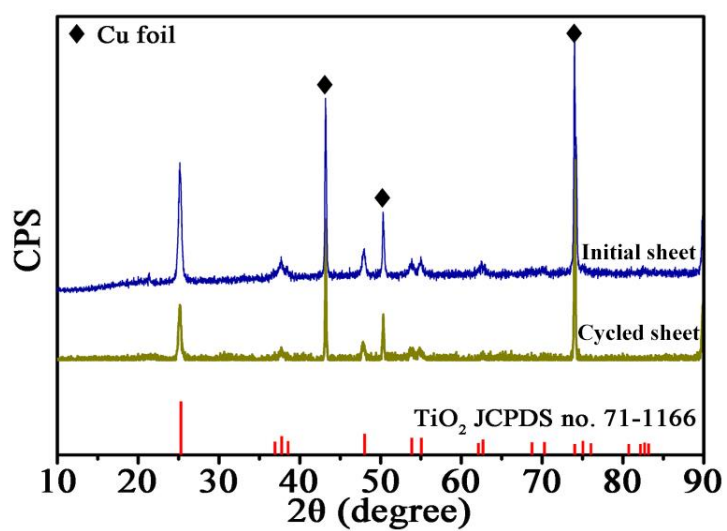

**Fig. S5** XRD patterns of S2 prior to cycling and after 100 cycles at 100 mA g<sup>-1</sup>.
