# Supplementary figures and images for: Synergistic modification of commercial TiO2 by combined carbon sources of citric acid and sodium carboxymethyl cellulose
Source: Royal Society of Chemistry journal article supplement (doi:10.1039/c9nj05412j), 2019-12-19

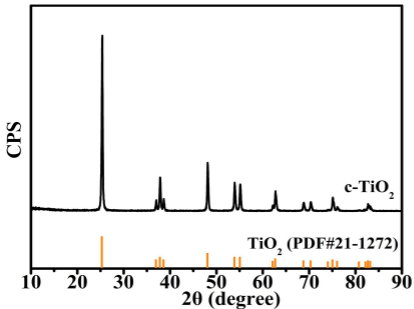

Supplement: c9nj05412j2.pdf [file c9nj05412j2.pdf]

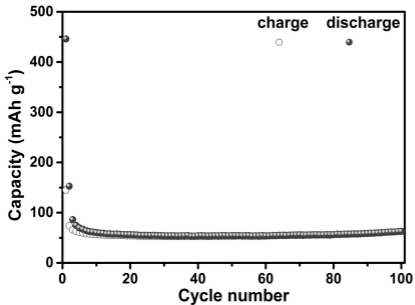

Supplement: c9nj05412j3.pdf [file c9nj05412j3.pdf]

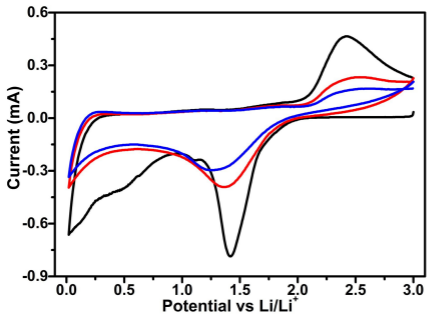

Supplement: c9nj05412j4.pdf [file c9nj05412j4.pdf]

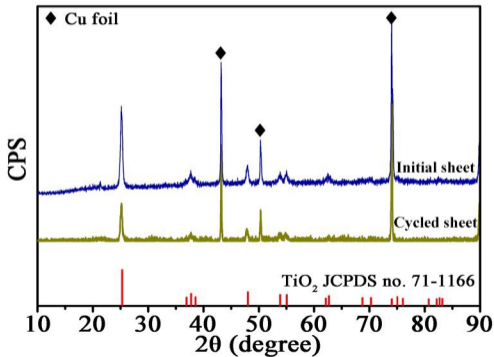

Supplement: c9nj05412j6.pdf [file c9nj05412j6.pdf]
